# Supplementary material
Source: PubMed Central journal article supplement (PMC2098822)
Supplement: ppat.0030170.sg002.pdf [file ppat.0030170.sg002.pdf]

A.

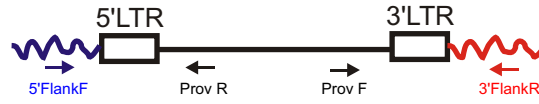

| Provirus names | 5'FlankF/Prov R                                           | ProvF/3'FlankR                                        |
|----------------|-----------------------------------------------------------|-------------------------------------------------------|
| enJSRV-1       | 5'-tgggctgccatggagcgttca / 5'-actgtcgaacagccccgcttgg      | 5'-agccttcattcactgtggcga / 5'-agttctggctcagggtgccactg |
| enJSRV-2       | 5'-agcacaaccaaccagaacct / 5'-agagtagtggcgaggaaagc         | 5'-agccttcattcactgtggcga / 5'-gcaggtggaaaaggggcaac    |
| enJSRV-3       | 5'-acttaattgtggctaccctgg / 5'-ggtgaggaaaactgtgaacagc      | 5'-agccttcattcactgtggcga / 5'-actaagagctccacagcctaga  |
| enJSRV-4       | 5'-agcataaccaacgcaatggac / 5'-atcatgggacttcgggctgc        | 5'-agccttcattcactgtggcga / 5'-ggtggagaactgtgacttc     |
| enJSRV-5       | 5'-gtgtgtcatagacacagtggt / 5'-actgtcgaagtgcagccca         | 5'-agccttcattcactgtggcga / 5'-actatcacagtgacatgcagc   |
| enJSRV-6       | 5'-ccagttccagaaggaaggag / 5'-agccctacaacctgggtgccca       | 5'-agccttcattcactgtggcga / 5'-cagggaataactgtgtactct   |
| enJSRV-7       | 5'-tgtgcacacgtggggagtc / 5'-tagtggcgaggaaaactgtcgagc      | 5'-agccttcattcactgtggcga / 5'-aggaactccaggtctgtcca    |
| enJSRV-8       | 5'-tcagtgatcaatgtctcga / 5'-tagtggcgaggaaaactgtcgagc      | 5'-agccttcattcactgtggcga / 5'-gtatgggattgggaaaagc     |
| enJSRV-9       | 5'-agctagcagtttccagtcagc / 5'-gtatggcgaggaaaactgtcgagc    | 5'-agccttcattcactgtggcga / 5'-agactgcatagaacaaaggctgc |
| enJSRV-10      | 5'-agcgtggaaatcaccagaagc / 5'-tagtggcgaggagaactgtcgagc    | 5'-agccttcattcactgtggcga / 5'-cccattggatgtgttccglg    |
| enJSRV-11      | 5'-tgttctcctggcccgcatac / 5'-tagtggcgaggaaaactgtcgagc     | 5'-agccttcattcactgtggcga / 5'-gctggttttagaaaagcgagag  |
| enJSRV-13      | 5'-gcatttcactgtaccctacca / 5'-gtatggcgaggagaactgtcgagc    | 5'-agccttcattcactgtggcga / 5'-aggtgtcctactccaagctgc   |
| enJSRV-14      | 5'-catccccccccagcctcgcca / 5'-tagtggcgaggaaaactgtcgagc    | 5'-agccttcattcactgtggcga / 5'-ggagttcactcagactcagctcc |
| enJSRV-15      | 5'-cttctagtagacaatagtggt / 5'-tagtggcgaggaaaactgtcgagc    | 5'-agccttcattcactgtggcga / 5'-tactgttctcctgaccagg     |
| enJSRV-16      | 5'-tgtcagttcccaggtgcccca / 5'-tagtggcgaggaaaactgtcgagc    | 5'-agccttcattcactgtggcga / 5'-ggccagttgacatctgccagga  |
| enJSRV-17      | 5'-tagtggcgaggaaaactgtcgaac / 5'-tagtggcgaggaaaactgtgaaag | 5'-agccttcattcactgtggcga / 5'-acttgggtgtctccatgctgt   |
| enJSRV-18      | 5'-gggaagattcttcttaggcctc / 5'-tagtggcgaggaaaactgtcgagc   | 5'-agccttcattcactgtggcga / 5'-caagtcagagccagagacca    |
| enJSRV-19      | 5'-aggctgtatattgcacctgc / 5'-tagtggcgaggagaactgtcgagc     | 5'-agccttcattcactgtggcga / 5'-tctcatgaagtatgggacc     |
| enJSRV-20      | 5'-agccttcattcactgtggcga / 5'-tagtggcgaggagaactgtcgagc    | 5'-agccttcattcactgtggcga / 5'-aggcaagctgacatcgtcc     |
| enJSRV-21      | 5'-ctgtgttcttggactgggt / 5'-actgttgaactcagccccagc         | 5'-agccttcattcactgtggcga / 5'-ggacaatctcagagacctccag  |
| enJSRV-22      | 5'-gcagctgccagctcctct / 5'-tagtggcgaggaaaactgtcgagc       | 5'-agccttcattcactgtggcga / 5'-ccatgatgggattgggggtg    |
| enJSRV-23      | 5'-gtgatgtgtctcacactgcctg / 5'-tagtggcgaggaaaactgtcgagc   | 5'-agccttcattcactgtggcga / 5'-actgcaacctggcaggggac    |
| enJSRV-24      | 5'-acaggcaacttggcctggga / 5'-ccccatattaglacaggtctg        | 5'-agccttcattcactgtggcga / 5'-tccaggatgtctgcccgtaggtg |
| enJSRV-25      | 5'-cctctgtcagtagccaccg / 5'-tagtggcgaggaaaactgtcgaac      | 5'-agccttcattcactgtggcga / 5'-gtgcaatctatacatgtccca   |
| enJSRV-26      | 5'-acgcagacaactggccagagtc / 5'-actgaccttctctgggaaacc      | 5'-agccttcattcactgtggcga / 5'-ggtggcctcagacagctcc     |
| enJS56A1       | 5'-tcaggggtgtcaggagcca / 5'-tagtggcgaggagaactgtcgagc      | 5'-agccttcattcactgtggcga / 5'-agctgagcatctccacaca     |
| enJS59A1       | 5'-gtcagaaccttacctgctgag / 5'-tagtggcgaggaaaactgtcgag     | 5'-taattgtgtggcgcggttc / 5'-attcgtaggcgtgctggac       |

B.

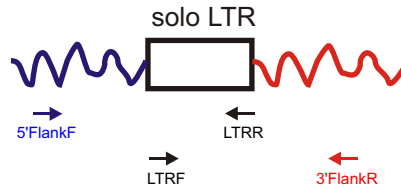

| provirus names | 5'FlankF/LTRF                                         | LTRF/3'FlankR                                       |
|----------------|-------------------------------------------------------|-----------------------------------------------------|
| enJSRV-7       | 5'-tgtgcacacgtggggagtc / 5'-gccagcacaagcaagagtcg      | 5'-gccagcacaagcaagagtcg / 5'-aggaactccaggtctgtcca   |
| enJSRV-8       | 5'-tcagtgatcaatgtctcga / 5'-agagtcacacctgcacagggag    | 5'-gccagcacaagcaagagtcg / 5'-gtatgggattgggaaaagc    |
| enJSRV-11      | 5'-tgttctcctggcccgcatac / 5'-gccagcacaagcaagagtcg     | 5'-gccagcacaagcaagagtcg / 5'-gctggttttagaaaagcgagag |
| enJSRV-15      | 5'-cttctagtagacaatagtggt / 5'-gccagcacaagcaagagtcg    | 5'-gccagcacaagcaagagtcg / 5'-tactgttctcctgaccagg    |
| enJSRV-16      | 5'-tgtcagttcccaggtgcccca / 5'-gccagcacaagcaagagtcg    | 5'-gccagcacaagcaagagtcg / 5'-ggccagttgacatctgccagga |
| enJSRV-18      | 5'-gggaagattcttcttaggcctc / 5'-gccagcacaagcaagagtcg   | 5'-gccagcacaagcaagagtcg / 5'-caagtcagagccagagacca   |
| enJSRV-22      | 5'-ggataagctacataaaaccaag / 5'-agagtcacacctgcacagggag | 5'-gccagcacaagcaagagtcg / 5'-ccatgatgggattgggggtg   |
| enJSRV-26      | 5'-acgcagacaactggccagagtc / 5'-agagtcacacctgcacagggag | 5'-gccagcacaagcaagagtcg / 5'-attcgtaggcgtgctggac    |

C.

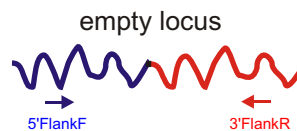

| provirus names | 5'FlankF/3'FlankR                                    |
|----------------|------------------------------------------------------|
| enJSRV-7       | 5'-tgtgcacacgtggggagtc / 5'-actcgagaggaagcagagggtc   |
| enJSRV-8       | 5'-tcagtgatcaatgtctcga / 5'-tgggtgagcatgcacacag      |
| enJSRV-11      | 5'-tgttctcctggcccgcatac / 5'-gctggttttagaaaagcgagag  |
| enJSRV-15      | 5'-gtgggaagaaattgtgttac / 5'-ccataaggggtgtatctgtca   |
| enJSRV-16      | 5'-tgtcagttcccaggtgcccca / 5'-gtgcaagagctagagctggaag |
| enJSRV-18      | 5'-gggaagattcttcttaggcctc / 5'-atgaaccggactccatggcag |
| enJSRV-22      | 5'-ggataagctacataaaaccaag / 5'-ccatgatgggattgggggtg  |
| enJSRV-26      | 5'-acgcagacaactggccagagtc / 5'-attcgtaggcgtgctggac   |
