# Supplementary material
Source: PubMed Central journal article supplement (PMC2098822)

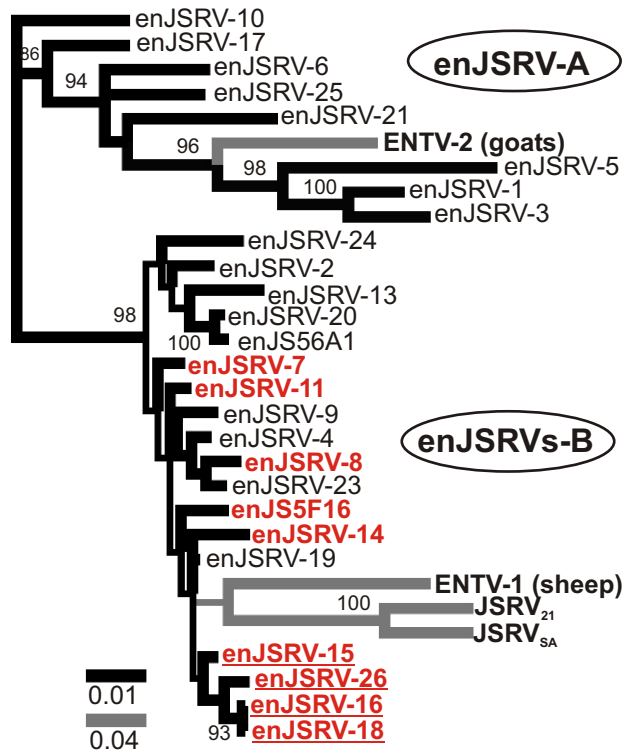

Supplement: ppat.0030170.sg001.pdf [file ppat.0030170.sg001.pdf]
